# Supplementary material
Source: MDPI journal article supplement (https://www.mdpi.com/2079-6412/14/2/219)
Supplement: s1 [file s1]

### **S1. Tuning the experimental parameters to achieve the well textured Sm-Co hard layer film with high coercivity**

We made an effort to get the well-textured Sm-Co hard layer film. The factors that could influence the texture of Sm-Co film such as substrate, deposition temperature and thickness of underlayer Cr, deposition temperature  $T_{\text{Sm-Co}}$  and sputtering power  $P_{\text{Sm-Co}}$  of Sm-Co, etc, have been considered. Many experimental conditions have been tried. Finally, we find that MgO substrate,  $P_{\text{Sm-Co}}$  and  $T_{\text{Sm-Co}}$  play the important roles in developing the well-textured Sm-Co film with high coercivity. Fig. S1 presents the hysteresis loops of Sm-Co films fabricated at different deposition temperatures. The good squareness of the hysteresis suggests the good texture. It can be seen that the deposition temperature can obviously influence the texture. The best texture is obtained for the film at deposition temperature of 600 °C. Too lower or too higher deposition temperature will make the texture worse. Fig. S2 shows the hysteresis loops of Sm-Co films fabricated with different sputtering powers for  $T_{\text{Sm-Co}} = 500$  °C. It is interesting to find that the rising of the sputtering powers notably improves not only the texture but also the coercivity. We further fabricated the Sm-Co films with different powers for  $T_{\text{Sm-Co}} = 600$  °C (see Fig. S3). Indeed, the increase of sputtering power can significantly increase the texture and coercivity. Surprisingly, an excellent texture is achieved for the film fabricated with  $P_{\text{Sm-Co}} \geq 150$  W. We further tried the higher deposition temperatures at the condition of high sputtering power  $P_{\text{Sm-Co}} = 150$  W (see Fig. S4). It can be seen that the higher deposition temperatures  $T_{\text{Sm-Co}} > 600$  °C give rise to the lower coercivity and worse texture. Therefore, the optimal experimental conditions to achieve the good texture of the Sm-Co film are  $P_{\text{Sm-Co}} \geq 150$  W and  $T_{\text{Sm-Co}} = 600$  °C. This film can help determine the values of  $H_{\text{ns}}$  and  $H_{\text{irr}}$  accurately. We think that the high  $P_{\text{Sm-Co}}$  at certain  $T_{\text{Sm-Co}}$  will effectively increase the kinetic energy of the sputtered Sm and Co atoms, leading to the significant improvement of epitaxial growth of Sm-Co film on the textured Cr/MgO substrate.

### **S2. The advantage of the well-textured Sm-Co hard layer film for precisely determining the nucleation field $H_{\text{ns}}$ of soft phase.**

For comparison, we prepared the Sm-Co(50 nm)/Fe (x nm) on SiO<sub>2</sub> and MgO substrates. Fig. S5 shows the hysteresis loops of these films. The Sm-Co hard layer film on SiO<sub>2</sub> substrate possesses an inferior texture and therefore poorer squareness of the hysteresis loops. It can be seen that the  $H_{\text{ns}}$  of soft phase can be more precisely determined from the hysteresis loops of well-textured Sm-Co/Fe films on MgO substrate, while that is hardly assessed from the hysteresis loops of Sm-Co/Fe films on SiO<sub>2</sub> substrate owing to the inferior texture and squareness of the hysteresis loops.

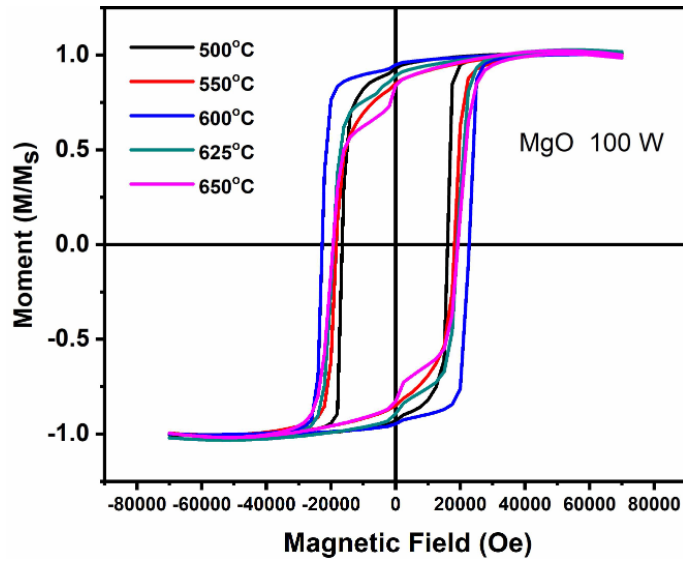

Figure S1: The hysteresis loops of Sm-Co films fabricated at different deposition temperatures.

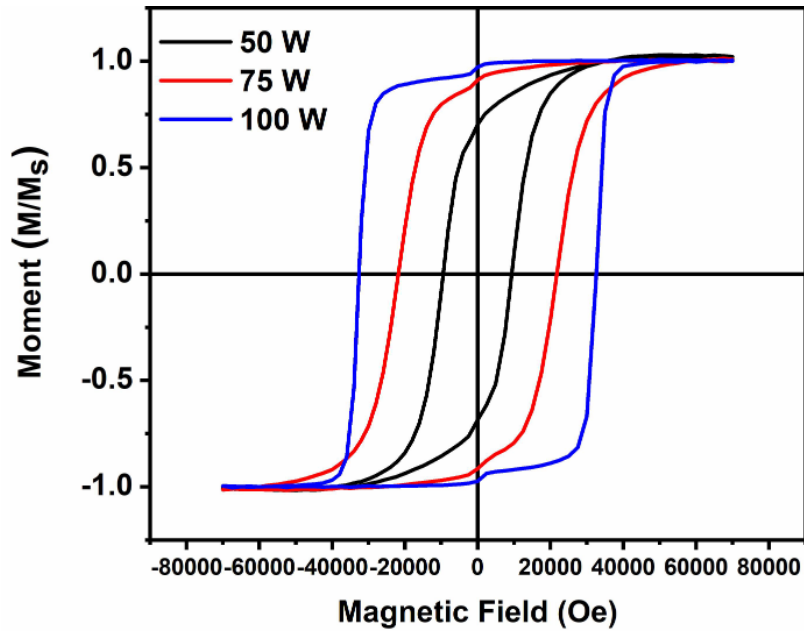

Figure S2: The hysteresis loops of Sm-Co films fabricated with different sputtering powers for  $T_{\text{Sm-Co}} = 500\text{ }^{\circ}\text{C}$ .

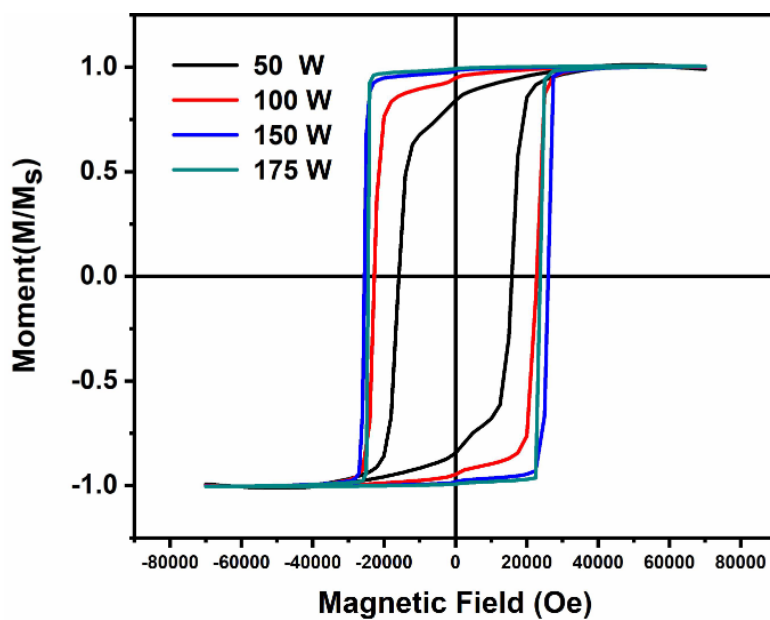

Figure S3: The hysteresis loops of Sm-Co films fabricated with different sputtering powers for  $T_{\text{Sm-Co}} = 600\text{ }^{\circ}\text{C}$ .

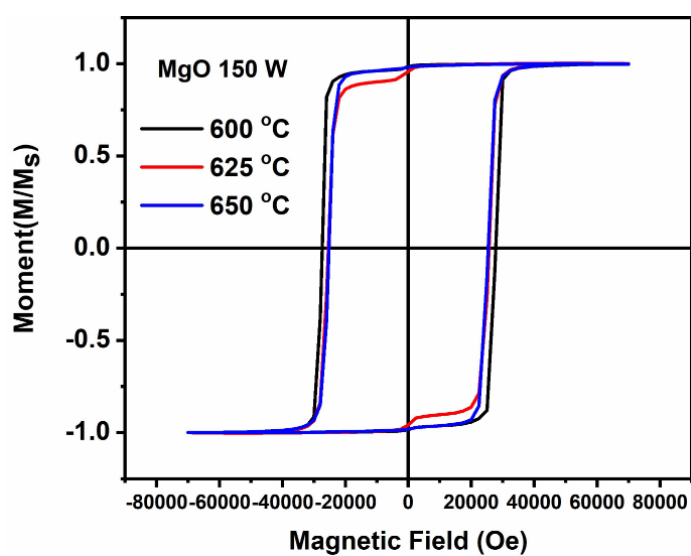

Figure S4: The hysteresis loops of Sm-Co films fabricated at higher deposition temperatures  $T_{\text{Sm-Co}} > 600\text{ }^{\circ}\text{C}$ .

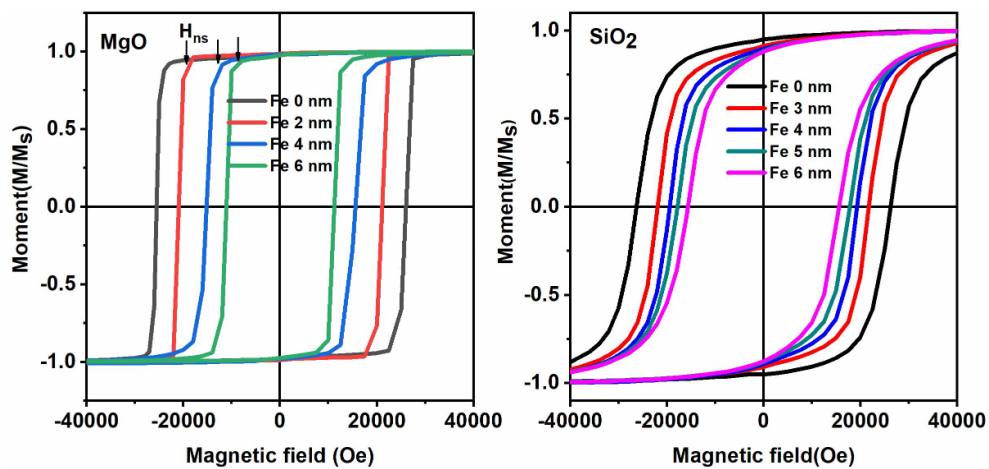

Figure S5: The hysteresis loops of Sm-Co(50 nm)/Fe(x nm) on SiO<sub>2</sub> and MgO substrates.
